# Supplementary material for: Awareness Development and Usage of Mobile Health Technology Among Individuals With Hypertension in a Rural Community of Bangladesh: Randomized Controlled Trial
Source: PubMed Central journal article supplement (PMC7752538; doi:10.2196/19137), 2020-12-07
Supplement: jmir_v22i12e19137_app3.pdf [file jmir_v22i12e19137_app3.pdf]

### Multimedia Appendix 3. Contents of text messages.

| Message content                   | Examples                                                                                                                                                                                               | Text messaging schedules                                                |
|-----------------------------------|--------------------------------------------------------------------------------------------------------------------------------------------------------------------------------------------------------|-------------------------------------------------------------------------|
| Reduce sodium intake (salt)       | Sodium intake is <6g/day (just under a teaspoon)<br>No extra salt, not even with fruits or green leafy vegetables, pickles, milk or any other foods<br>It keeps your high blood pressure under control | 5 times for 1 <sup>st</sup> month and once a week for the rest 4 months |
| Avoid taking oily and fatty foods | Like beef, mutton, poultry, Pastries, cakes and other junk foods<br>You can gain weight                                                                                                                |                                                                         |
| Eat more fruits and vegetables    | Banana, starfruits, papaya and so on<br>80 grams per servings (fruits small size-full and large size-half) (per meal) per day<br>It makes you healthy                                                  |                                                                         |
| Do exercise regularly             | Regular exercise (walking, running, cycling, household work) for 30 minutes most days of the week<br>It keeps your heart well                                                                          |                                                                         |
| Take your medicine regularly      | Don't change and stop your hypertensive treatment without your doctor's guidance                                                                                                                       |                                                                         |

#### Examples of two-way text messaging component

CHWs: Reduce salt intake.

Participant A: How much salt I need to cut?

CHWs: You can measure like under a teaspoon.

Participant A: Ok, I will.

CHWs: Avoid taking oily and fatty foods.

Participant B: What kind of foods should I stop?

CHWs: Beef, mutton, pastries!

Participant B: Ok.

CHWs: Eat more fruits and vegetables.

Participant C: What types of fruits and vegetables?

CHWs: Banana, guava, green leafy vegetables!

Participant C: Ok.

CHWs: Do exercise regularly.

Participant D: What types and how long?

CHWs: Walking, household work at least 30 minutes daily.

Participant D: I am doing, but not every day.

CHWs: Please do it every day.

Participant D: I will follow.

CHWs: Don't change or stop your medicine without your doctor's guidance.

Participant E: I drop it sometimes.

CHWs: Please don't do that.

Participant E: Ok.
