# Supplementary material for: Awareness Development and Usage of Mobile Health Technology Among Individuals With Hypertension in a Rural Community of Bangladesh: Randomized Controlled Trial
Source: PubMed Central journal article supplement (PMC7752538; doi:10.2196/19137), 2020-12-07
Supplement: jmir_v22i12e19137_app4.pdf [file jmir_v22i12e19137_app4.pdf]

**Multimedia appendix 4.** Behavioral change evaluation questionnaire.

| Questions                                                                   | 5                                   | 4                                            | 3                                             | 2                                              | 1                                           |
|-----------------------------------------------------------------------------|-------------------------------------|----------------------------------------------|-----------------------------------------------|------------------------------------------------|---------------------------------------------|
| 1. How many days do you eat fruits in a week?                               | Everyday/week                       | 5-6 days/week                                | 3-4 days/week                                 | 1-2 days/week                                  | 0 day/week                                  |
| 2. How many days do you eat vegetables in a week?                           | Everyday/week                       | 5-6 days/week                                | 3-4 days/week                                 | 1-2 days/week                                  | 0 day/week                                  |
| 3. How much salt do you take per day in a week (goal is <6g/day)?           | Everyday/week<br>(<6g daily intake) | 5-6 days/week<br>(approx. 7-8g daily intake) | 3-4 days/week<br>(approx. 9-10g daily intake) | 1-2 days/week<br>(approx. 11-12g daily intake) | 0 day/week<br>(approx. 13-14g daily intake) |
| 4. How many days do you do 30 minutes physical activity/exercise in a week? | Everyday/week                       | 5-6 days/week                                | 3-4 days/week                                 | 1-2 days/week                                  | 0 day/week                                  |
| 5. How frequently do you check your blood pressure in a month?              | 8 times/month                       | 6 times/month                                | 4 times/month                                 | 2 times/month                                  | Never/ month                                |
| 6. How frequently do you monitor your body weight in a month?               | 8 times/month                       | 6 times/month                                | 4 times/month                                 | 2 times/month                                  | Never/ month                                |
