# Supplementary material for: Awareness Development and Usage of Mobile Health Technology Among Individuals With Hypertension in a Rural Community of Bangladesh: Randomized Controlled Trial
Source: PubMed Central journal article supplement (PMC7752538; doi:10.2196/19137), 2020-12-07

## Multimedia Appendix 6

### Chronological behavior changes: Figure S3 to S7

#### 1. Fruits intake (Figure S3)

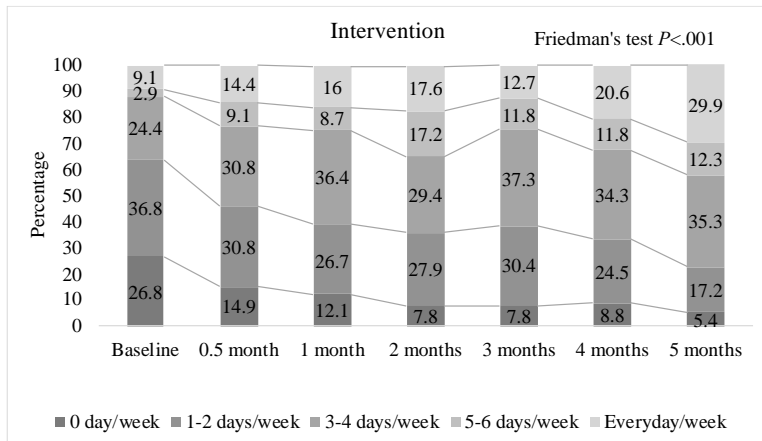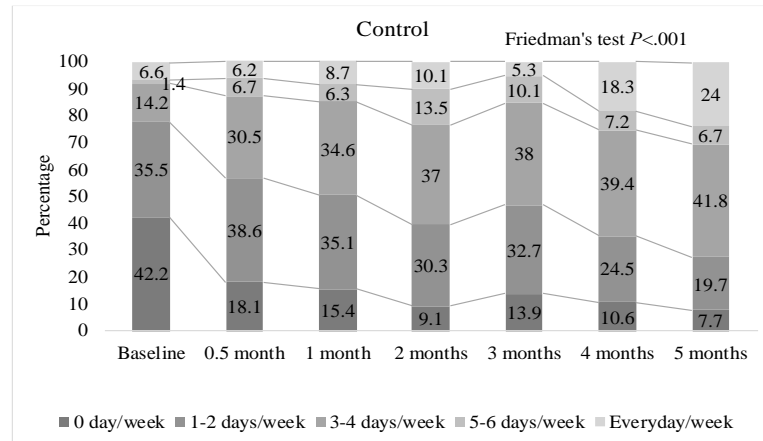

#### 2. Vegetables intake (Figure S4)

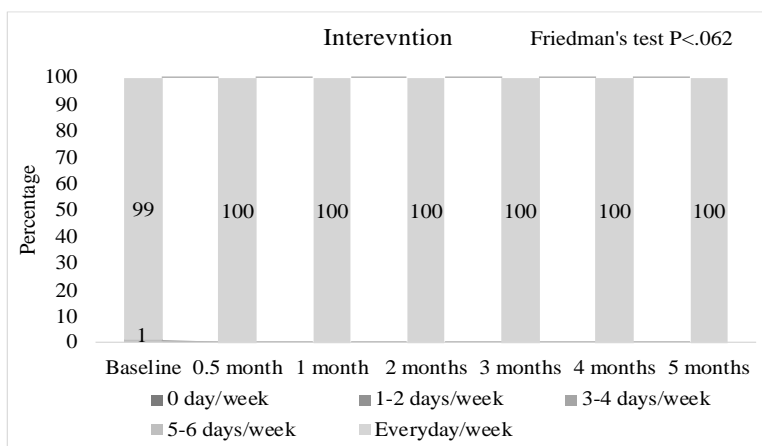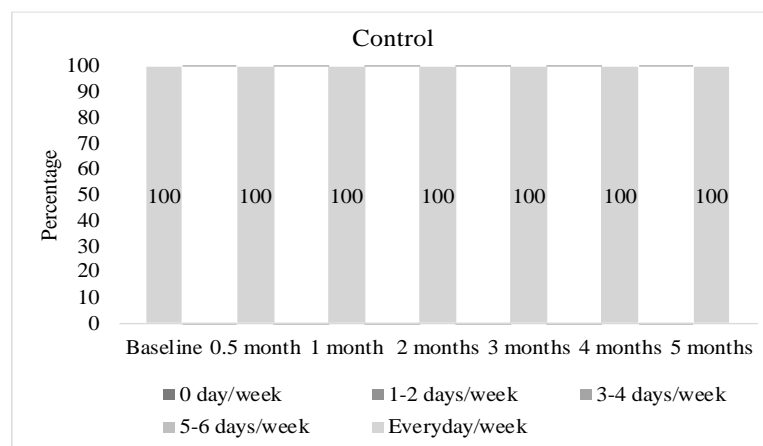

#### 3. Physical activity (Figure S5)

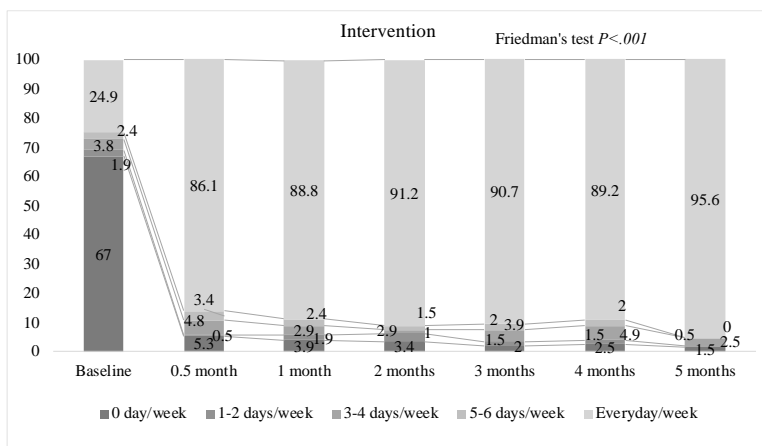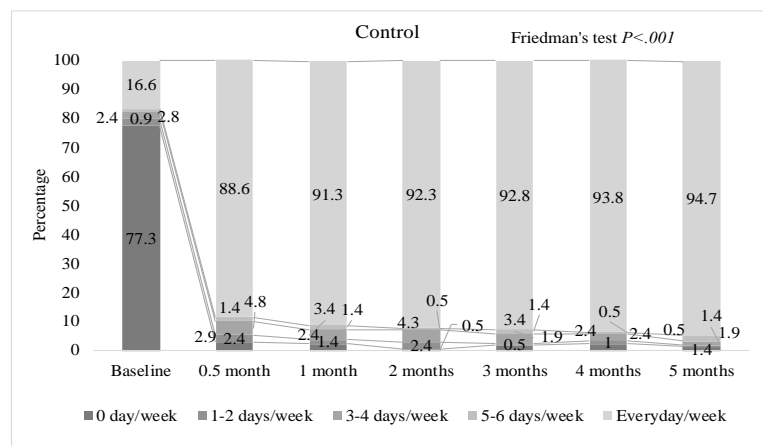

#### 4. Blood pressure monitoring (Figure S6)

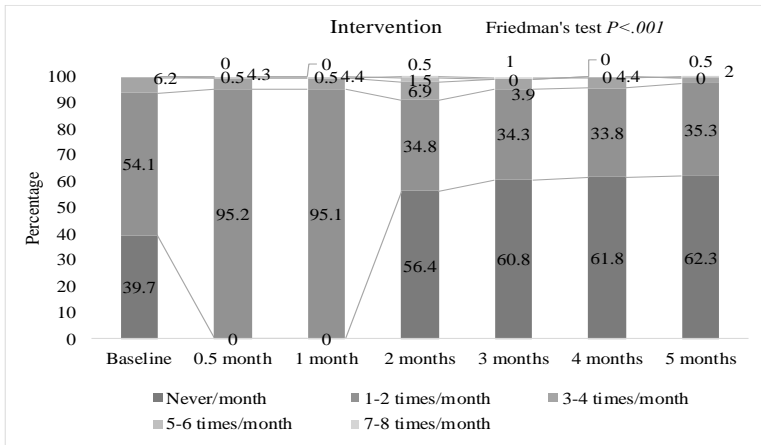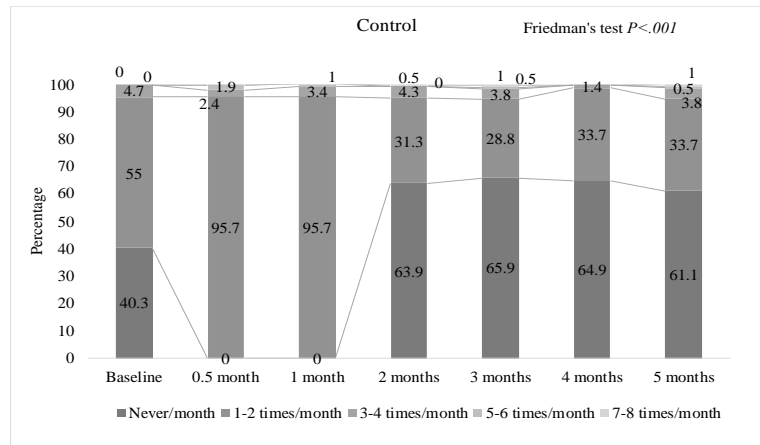

#### 5. Body weight monitoring (Figure S7)

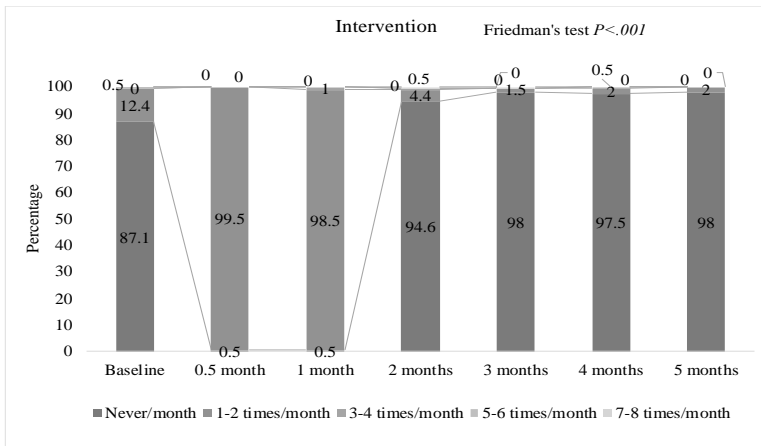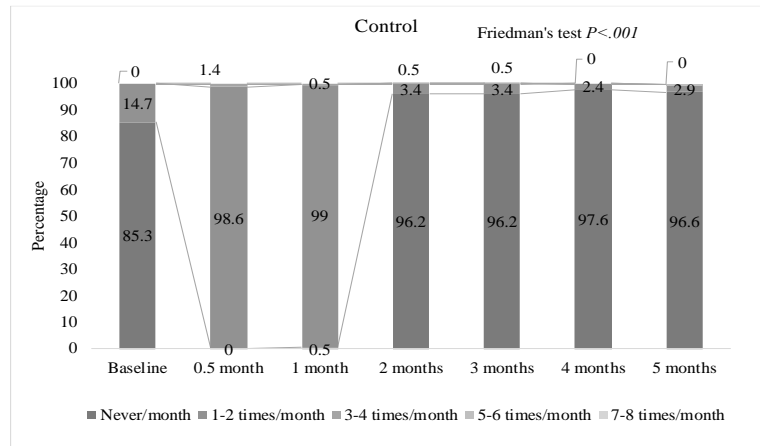

Supplement: jmir_v22i12e19137_app6.pdf [file jmir_v22i12e19137_app6.pdf]
